# Supplementary material for: Efficient charge transfer on the tunable morphology of TiO2/MoS2 photocatalyst for an enhanced hydrogen production
Source: Royal Society of Chemistry journal article supplement (doi:10.1039/d1nj01323h), 2021-01-01
Supplement: d1nj01323h1.pdf [file d1nj01323h1.pdf]

## Supporting Information

### Efficient charge transfer on tunable morphology of TiO<sub>2</sub>/MoS<sub>2</sub> photocatalyst for enhanced hydrogen production

Amit Gautam,<sup>[a,b]</sup> Yendrapati Taraka Prabhu,<sup>[a,c]</sup> Ujjwal Pal,<sup>[a,b]\*</sup>

<sup>a</sup>Academy of Scientific and Innovative Research (AcSIR), New Delhi, India

<sup>b</sup>Department of Energy and Environmental Engineering, CSIR-Indian Institute of Chemical Technology, Hyderabad, India.

<sup>c</sup>Analytical and structural Chemistry Division, CSIR-Indian Institute of Chemical Technology, Hyderabad, India.

\*Corresponding author. E-mail address: [upal03@gmail.com](mailto:upal03@gmail.com)

#### CHARACTERIZATION

The crystallographic phase of the prepared samples were determined by X-ray diffraction (XRD). The crystallite size was calculated by using the Scherrer formula ( $d = 0.9\lambda/B \cos \theta$ , where  $d$ ,  $\lambda$ ,  $B$  and  $\theta$  are the crystallite size, Cu K $\alpha$  wavelength, full width at half maximum (FWHM) intensity in radians and Bragg's diffraction angle, respectively). The light harvesting capability of the samples were assessed by using UV-vis diffuse reflectance spectroscopy (DRS) Perkin Elmer Lambda 750 accompanied by an integrating sphere accessory and utilizing BaSO<sub>4</sub> as a diffuse reflectance standard in the wavelength spanning from 300 to 2000 nm. The valance states and surface chemical composition of sample was studied by XPS analysis on a KRATOS AXIS 165 with Mg K $\alpha$  irradiation. About 10<sup>-9</sup> Torr pressure was maintained in the spectrometer. The Field emission scanning electron microscopy (FESEM) images of sample were taken by using JEOL JSM 7610F. The high-resolution transmission electron microscopy (HR-TEM) images of TiO<sub>2</sub>@MoS<sub>2</sub> were obtained using FEI Tecnai FE12 transmission electron microscope with a changeable accelerating voltage range of 40- 120V. All TEM samples were prepared by depositing a drop of diluted suspensions in acetone on a carbon coated copper grid and allowed to dry naturally. Photoelectrochemical studies were executed on CHI 6005E electrochemical analyzer (CH Instruments Inc., USA).

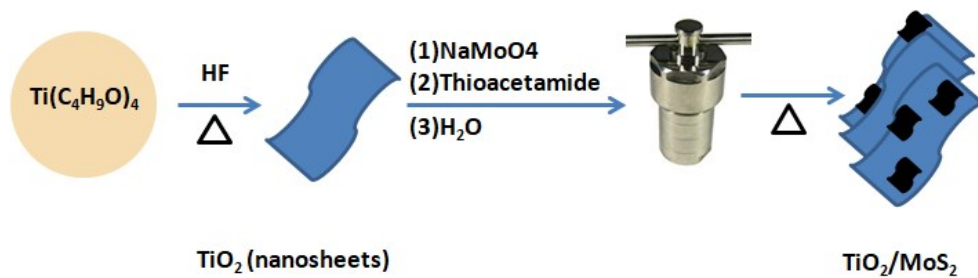

**Scheme S1.** Schematic presentation for preparation of  $\text{TiO}_2/\text{MoS}_2$  composite.

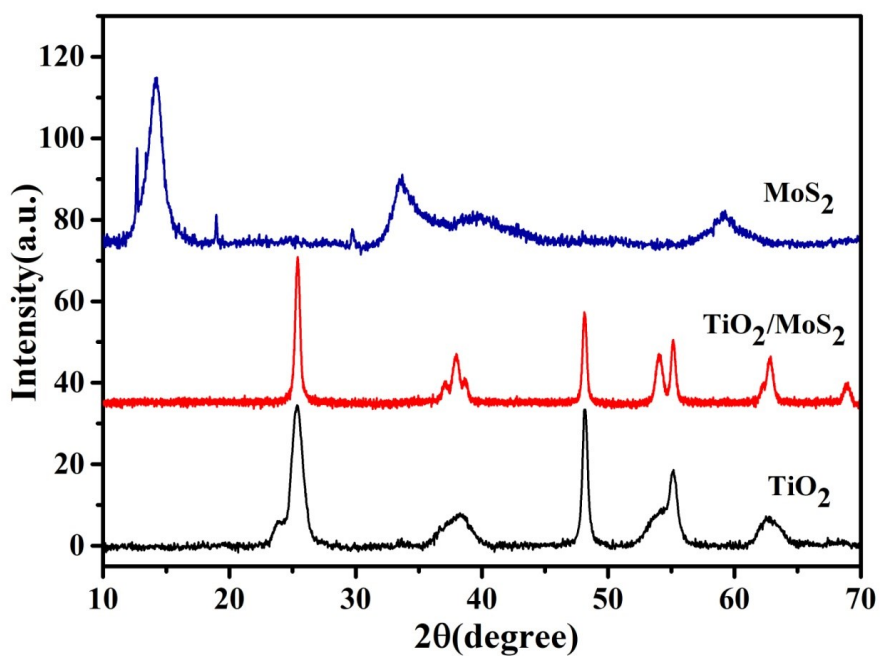

**Figure S1.** XRD pattern of  $\text{TiO}_2$ ,  $\text{MoS}_2$  And  $\text{TiO}_2/\text{MoS}_2$  composite.

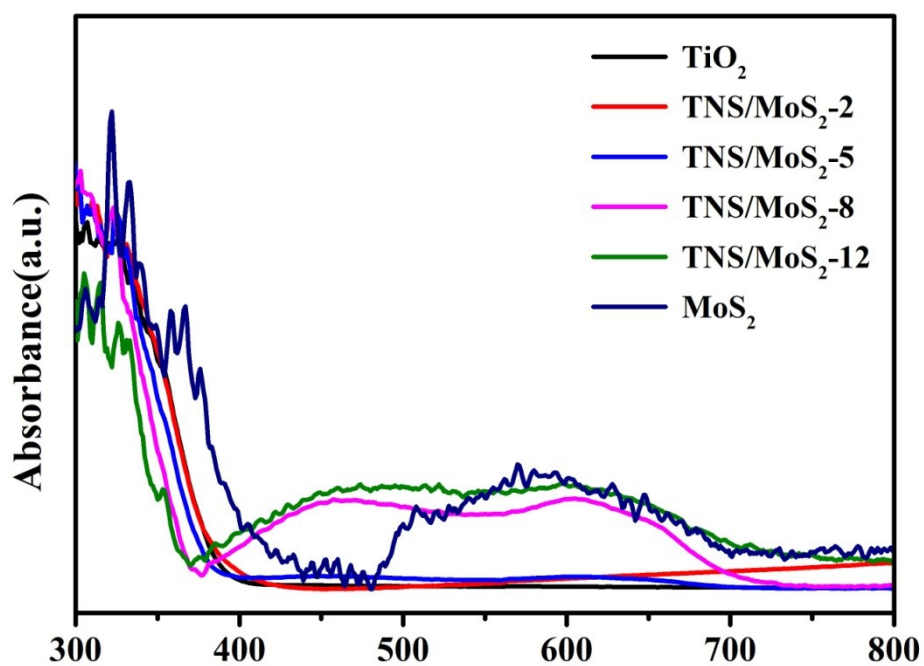

Figure S2. UV-Vis DRS spectra of TNS/MoS<sub>2</sub>

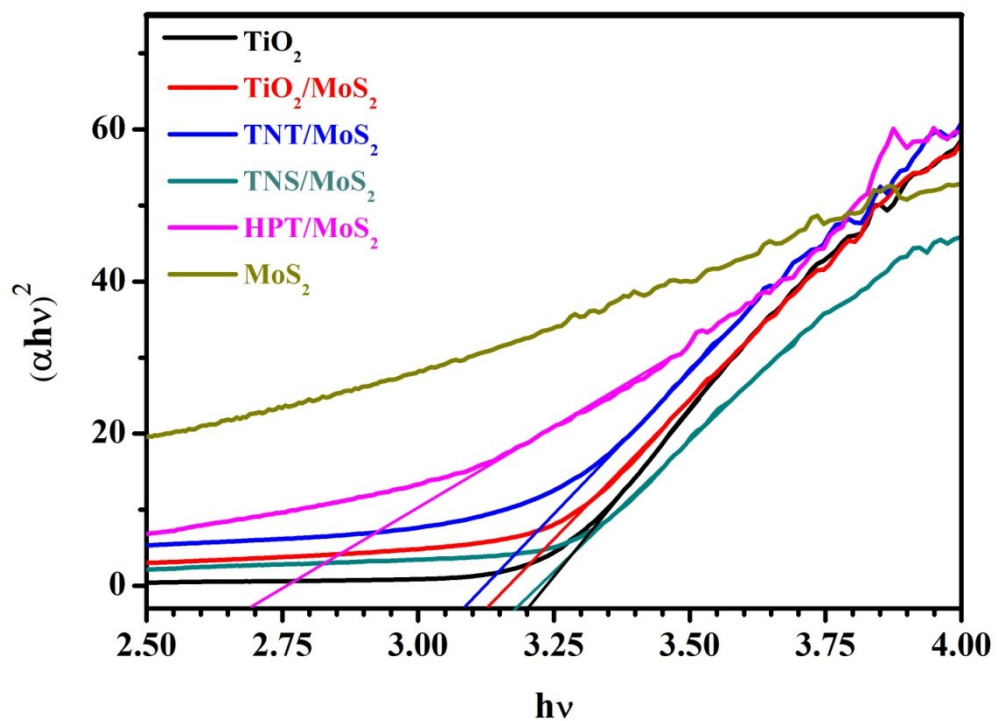

Figure S3. Tauc plot of TiO<sub>2</sub> and TiO<sub>2</sub>/MoS<sub>2</sub> composite.

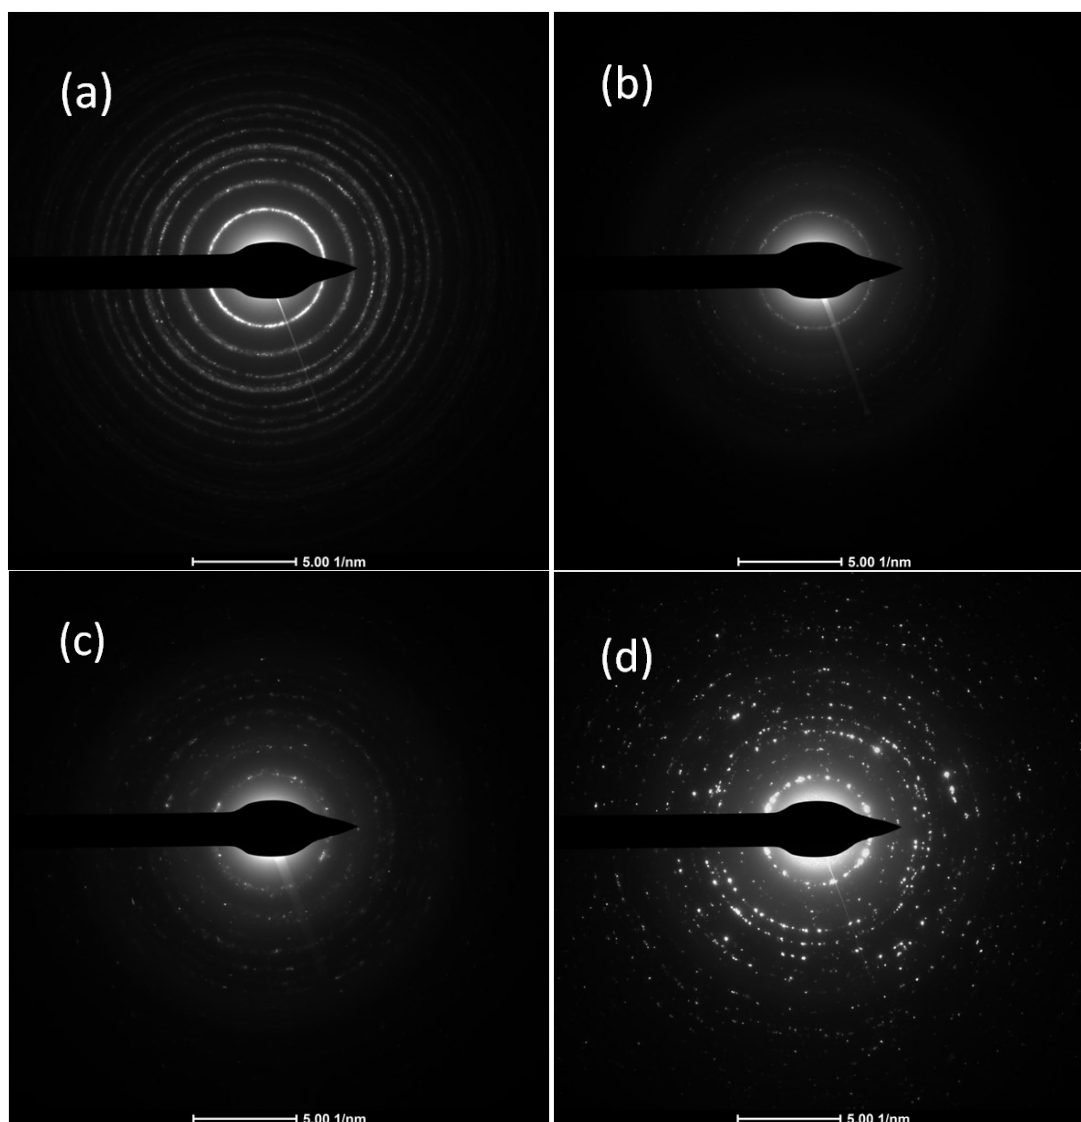

**Figure S4.** SAED pattern of (a)TiO<sub>2</sub>/MoS<sub>2</sub>, (b)TNT/MoS<sub>2</sub>, (c)HPT/MoS<sub>2</sub> and (d) TNS/MoS<sub>2</sub>.

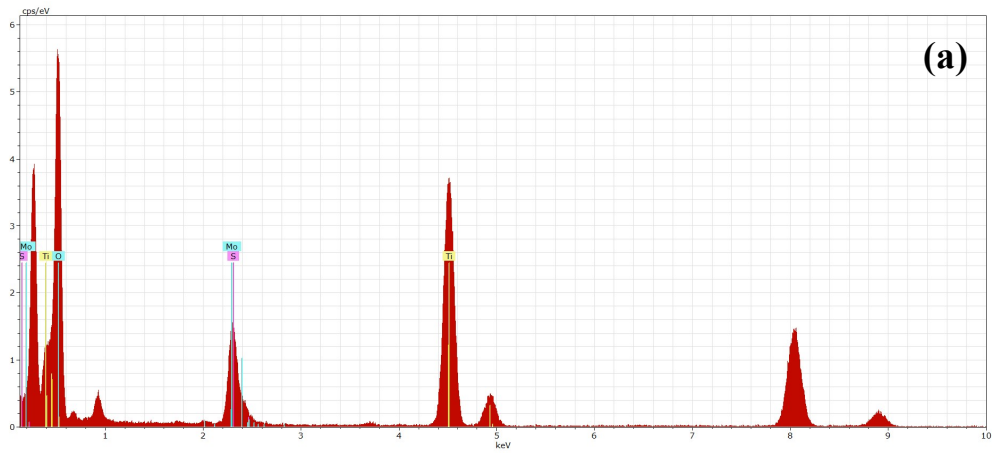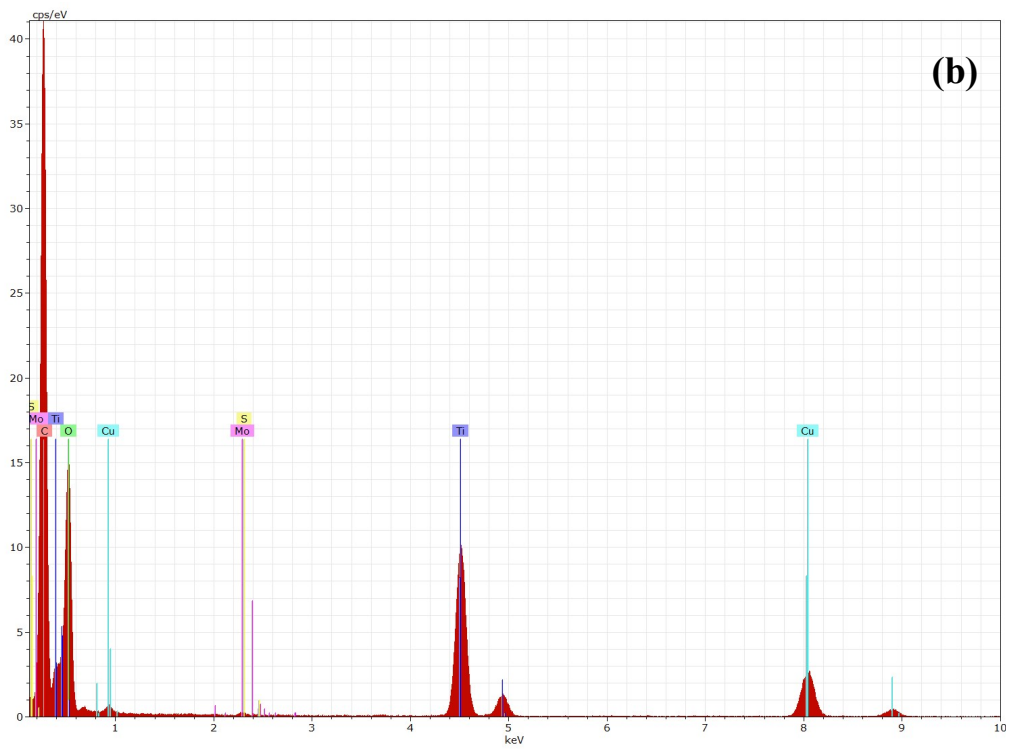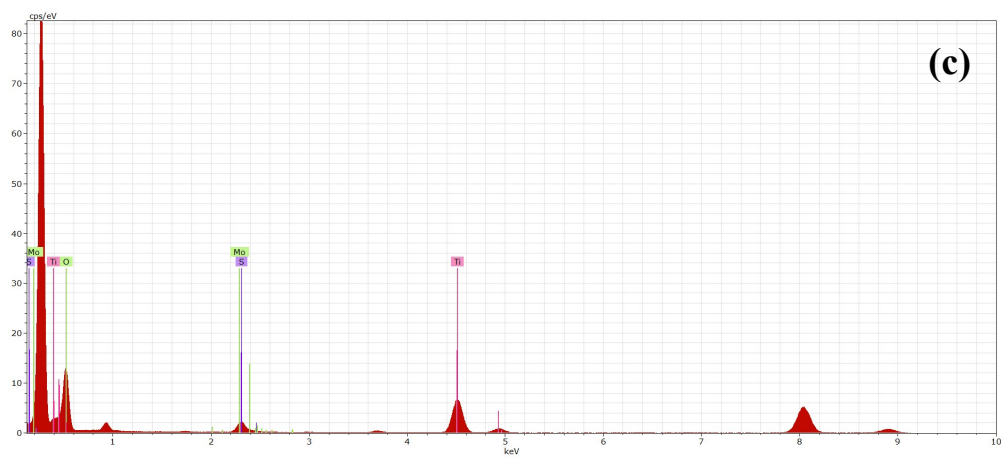

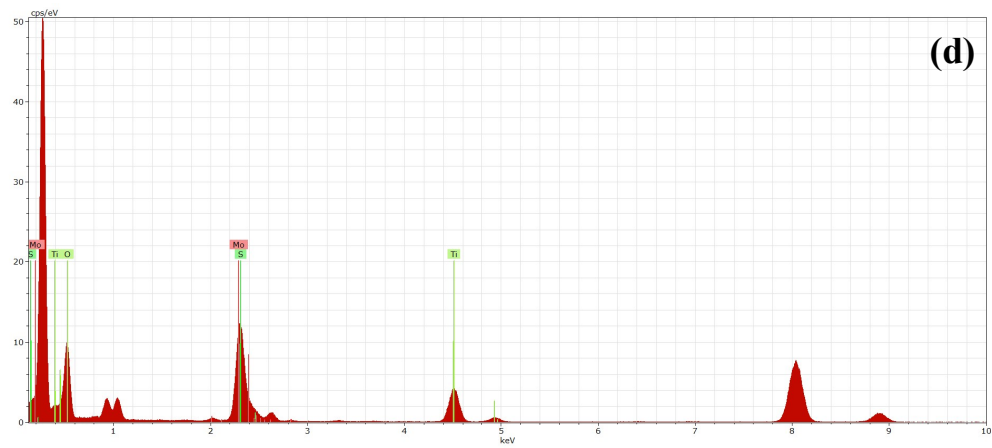

**Figure S5.** EDAX pattern of (a)  $\text{TiO}_2/\text{MoS}_2$  (b)  $\text{TNS}/\text{MoS}_2$  (c)  $\text{TNT}/\text{MoS}_2$  and (d)  $\text{HPT}/\text{MoS}_2$ .

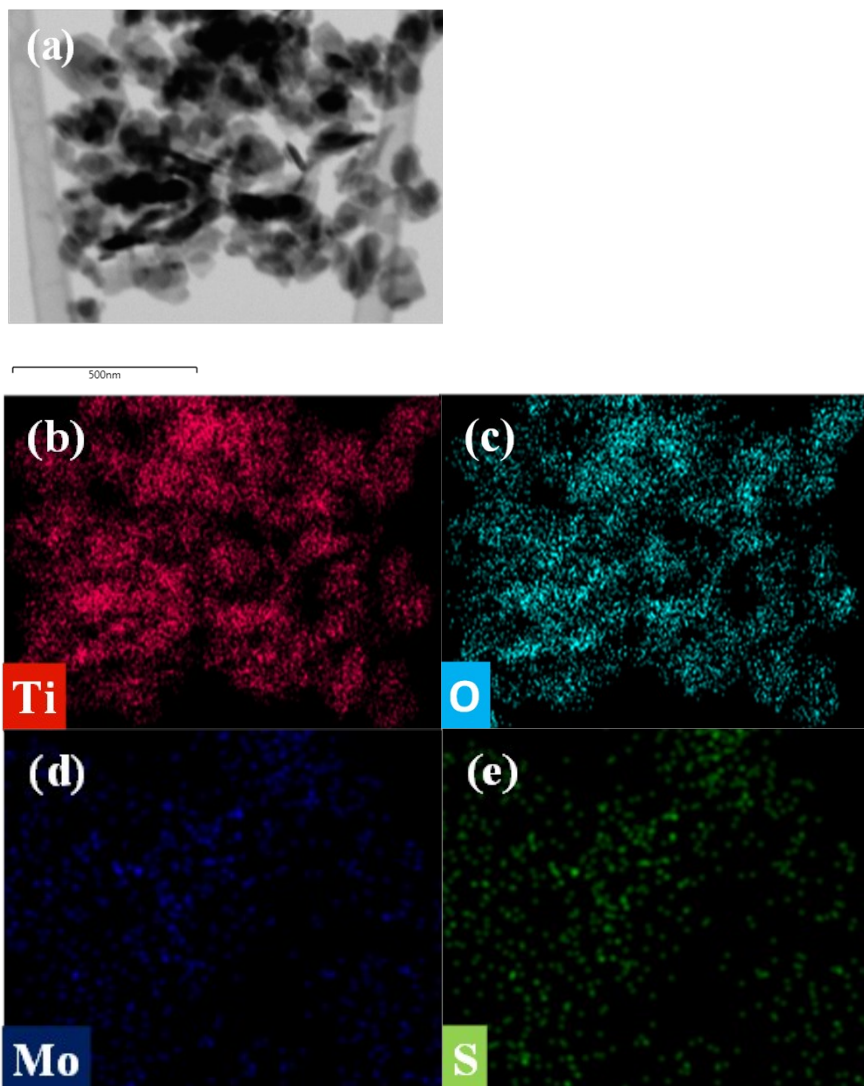

**Figure S6.** Elemental mapping of TNS/MoS<sub>2</sub>

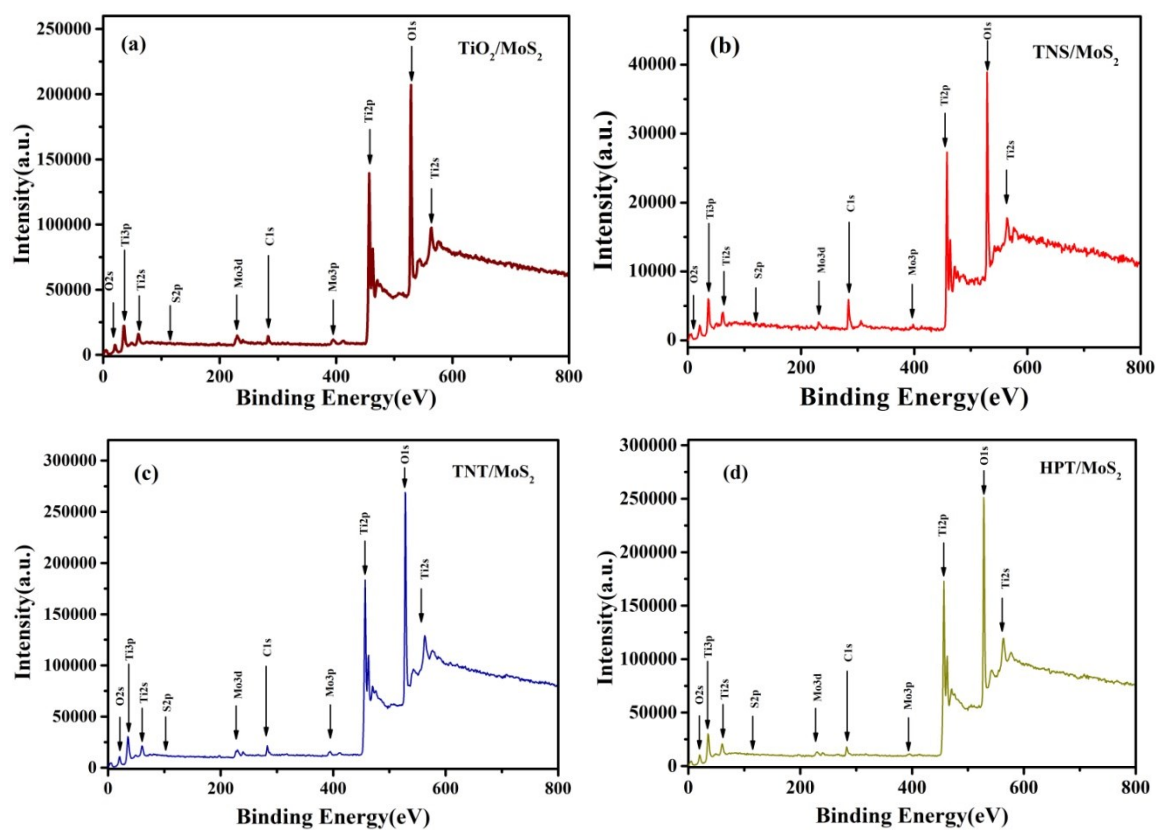

**Figure S7.** Survey XPS spectrum of (a)TiO<sub>2</sub> /MoS<sub>2</sub> (b)TNS/MoS<sub>2</sub> (c) TNT/MoS<sub>2</sub> and (d) HPT/MoS<sub>2</sub>.

**Table S1.** Standard deviation of XPS analysis of actual data and fitted data (mentioned in %)

| Catalyst                           | Ti         | O          | Mo        | S         |
|------------------------------------|------------|------------|-----------|-----------|
| TiO <sub>2</sub> /MoS <sub>2</sub> | 1.42±0.23  | 0.88±0.085 | 4.23±0.12 | 5.13±0.13 |
| TNT/MoS <sub>2</sub>               | 1.63±0.41  | 0.86±0.075 | 5.03±0.17 | 4.9±0.11  |
| TNS/MoS <sub>2</sub>               | 1.57±0.25  | 0.79±0.065 | 4.61±0.12 | 5.09±0.14 |
| HPT/MoS <sub>2</sub>               | 1.61± 0.52 | 0.85±0.054 | 4.83±0.15 | 4.76±0.12 |



**Table S2.** Comparative table of photocatalytic hydrogen production.

| S.No | Methods      | Materials                                                  | Light Source           | SED                                                               | Vessel        | H <sub>2</sub> evolution rate ( $\mu\text{mol g}^{-1}\text{h}^{-1}$ ) | Ref.     |
|------|--------------|------------------------------------------------------------|------------------------|-------------------------------------------------------------------|---------------|-----------------------------------------------------------------------|----------|
| 1    | Hydrothermal | CuInS <sub>2</sub> /MoS <sub>2</sub> /TiO <sub>2</sub>     | 300W Xenon arc lamp    | Na <sub>2</sub> S & Na <sub>2</sub> SO <sub>3</sub> (0.1M)        | Pyrex flask   | 141                                                                   | 1        |
| 2    | Ball mill    | MoS <sub>2</sub> /TiO <sub>2</sub> (P25)                   | 300W Xenon arc lamp    | Methanol                                                          | Not mentioned | 150.7                                                                 | 2        |
| 3    | Hydrothermal | MoS <sub>2</sub> /TiO <sub>2</sub> nanofibre               | 300W Xenon arc lamp    | Na <sub>2</sub> S & Na <sub>2</sub> SO <sub>3</sub> (0.25M)       | Quartz flask  | 490                                                                   | 3        |
| 4    | CVD          | MoS <sub>2</sub> /TiO <sub>2</sub> nanotube                | Not mentioned          | Not mentioned                                                     | Not mentioned | 440                                                                   | 4        |
| 5    | Hydrothermal | MoS <sub>2</sub> /B-TiO <sub>2</sub>                       | 300W UV xenon arc lamp | Methanol                                                          | Pyrex flask   | 500                                                                   | 5        |
| 6    | Hydrothermal | MoS <sub>2</sub> /TiO <sub>2</sub> nanofibre               | 300W Xenon arc lamp    | Na <sub>2</sub> S (0.35M) Na <sub>2</sub> SO <sub>3</sub> (0.25M) | Quartz flask  | 1600                                                                  | 6        |
| 7    | Hydrothermal | MoS <sub>2</sub> QD/TiO <sub>2</sub>                       | One sun                | Methanol                                                          | Quartz flask  | 3100                                                                  | 7        |
| 8    | Hydrothermal | MOF-derived flower like MoS <sub>2</sub> /TiO <sub>2</sub> | 300W Xenon arc lamp    | TEOA                                                              | Not Mentioned | 10046                                                                 | 8        |
| 9    | CVD          | MoS <sub>2</sub> /TiO <sub>2</sub> nanosheet               | 300W Xenon arc lamp    | Ethanol                                                           | Quartz flask  | 4300                                                                  | 9        |
| 10   | Hydrothermal | MoS <sub>2</sub> -TiO <sub>2</sub> /Au Hybrid              | 300W Xenon arc lamp    | Methanol                                                          | Quartz flask  | 190                                                                   | 10       |
| 11   | Hydrothermal | MoS <sub>2</sub> /TiO <sub>2</sub> (commercial anatase)    | 300W Xenon arc lamp    | Na <sub>2</sub> S (0.3M) Na <sub>2</sub> SO <sub>3</sub> (0.3M)   | Pyrex flask   | 41.33                                                                 | Our work |
| 12   | Hydrothermal | MoS <sub>2</sub> /TiO <sub>2</sub> (nanotubes)             | 300W Xenon arc lamp    | Na <sub>2</sub> S (0.3M) Na <sub>2</sub> SO <sub>3</sub> (0.3M)   | Pyrex flask   | 29.71                                                                 | Our work |
| 13   | Hydrothermal | MoS <sub>2</sub> /TiO <sub>2</sub> (nanosheets)            | 300W Xenon arc lamp    | Na <sub>2</sub> S (0.3M) Na <sub>2</sub> SO <sub>3</sub> (0.3M)   | Pyrex flask   | 77.41                                                                 | Our work |
| 14   | Hydrothermal | MoS <sub>2</sub> /TiO <sub>2</sub> (hierarchical)          | 300W Xenon arc lamp    | Na <sub>2</sub> S (0.3M) Na <sub>2</sub> SO <sub>3</sub> (0.3M)   | Pyrex flask   | 65.54                                                                 | Our work |

**Table S3.** ICP-AES analysis of different composite.

| S.No | Sample                             | Mo(mg/l) | Ti(mg/l) |
|------|------------------------------------|----------|----------|
| 1    | TiO <sub>2</sub> /MoS <sub>2</sub> | 10.37    | 437.0    |
| 2    | TNT/MoS <sub>2</sub>               | 12.57    | 453.5    |
| 3    | HPT/MoS <sub>2</sub>               | 13.59    | 445.9    |
| 4    | TNS/MoS <sub>2</sub>               | 11.31    | 460.6    |

1. Y-J. Yuan, G. Fang, D. Chen, Y. Huang, Li-X. Yang, D-P. Cao, J. Wang, Yu Z-T and Zou Z-G, *Dalton Trans.*, 2018, **47**, 5652-5659.
2. X. Yang, H. Huang, B. Jin, J. Luo and X. Zhou, *RSC Adv.*, 2016, **6**, 107075-107080.
3. B. Ma, P-Y. Guan, Q-Y. Li, M. Zhang and S-Q. Zang, *Appl. Mater. Interfaces.*, 2016, **8**, 26794–26800.
4. H. He, J. Lin, W. Fu, X. Wang, H. Wang, Q. Zeng, Q. Gu, Y. Li, C. Yan, B-K. Tay, C. Xue, X. Hu, S-T. Pantelides, W. Zhou and Liu Z, *Adv. Energy Mater.*, 2016, **6**, 1600464.
5. Y-Y. Li, J-H. Wang, Z-J. Luo, K. Chen, Z-Q. Cheng, L. Ma, S. Ding, L. Zhou and Q-Q. Wang, *Sci Rep.*, 2017, **7**, 7178.
